# Supplementary material for: Fast HILIC Method for Separation and Quantification of Non-Volatile Aromatic Compounds and Monosaccharides from Willow (Salix sp.) Bark Extract
Source: MDPI journal article supplement (doi:10.3390/app11093808), 2021-04-23
Supplement: s1 [file s1]

Archive with 1 entries (1 files):
- applsci-1176294-supplementary.pdf
